# Supplementary material for: Li3Na7B4P6O26: a new ultraviolet transparent congruently melting non-linear optical crystal
Source: Royal Society of Chemistry journal article supplement (doi:10.1039/d4dt01428f), 2024-01-01
Supplement: d4dt01428f1.pdf [file d4dt01428f1.pdf]

# $\text{Li}_3\text{Na}_7\text{B}_4\text{P}_6\text{O}_{26}$ : A New Ultraviolet Transparent Congruently-Melting Non-linear Optical Crystal

Sujuan Yu,<sup>1</sup> Jiangtao Fan,<sup>1</sup> Zhanggui Hu, \*<sup>1</sup> and Yicheng Wu<sup>1</sup>

1. Tianjin Key Laboratory of Functional Crystal Materials, Institute of Functional  
Crystal, Tianjin University of Technology, Tianjin 300384, China.

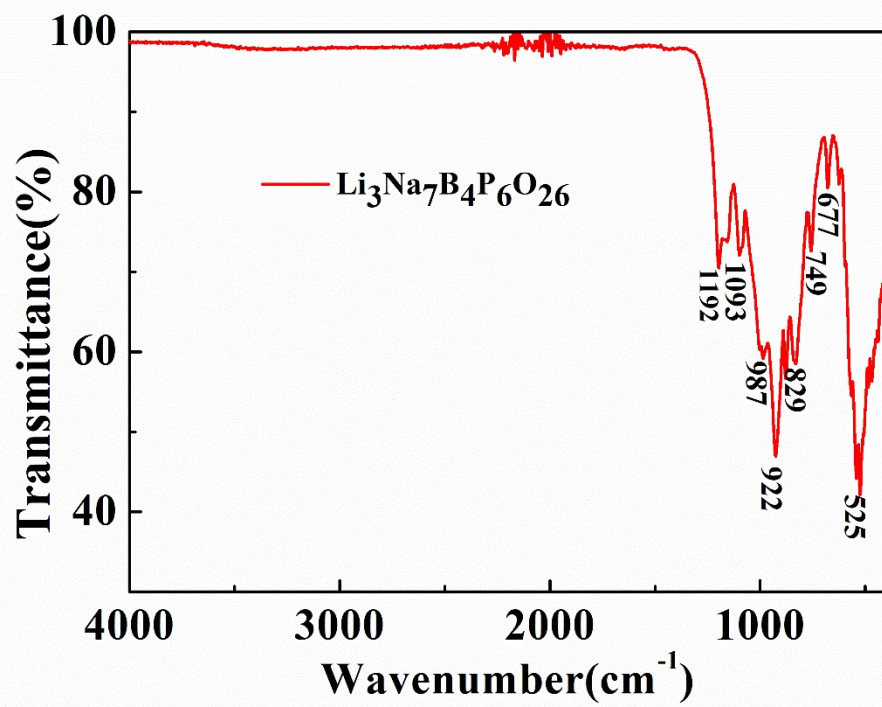

Figure S1 IR spectrum of LNBPO

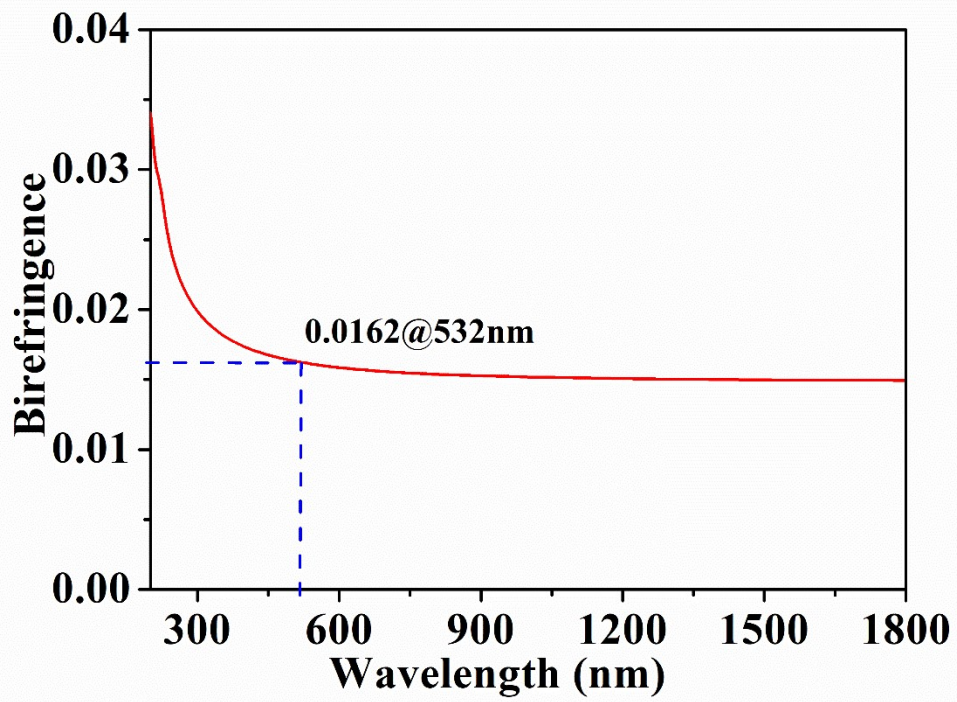

Figure S2 Birefringence curve of LNBPO

Table S1. Crystal data and structure refinements of LNBPO

|                                   |                                                                  |
|-----------------------------------|------------------------------------------------------------------|
| Empirical formula                 | $\text{Li}_3\text{Na}_7\text{B}_4\text{P}_6\text{O}_{26}$        |
| Formula weight                    | 826.81                                                           |
| Temperature                       | 293(2) K                                                         |
| Wavelength                        | 0.71073 Å                                                        |
| Crystal system                    | Orthorhombic                                                     |
| Space group                       | $Pca2_1$                                                         |
| Unit cell dimensions              | $a = 6.6568(6)$ Å<br>$b = 13.6358(12)$ Å<br>$c = 11.3226(12)$ Å  |
| Volume                            | $1027.76(17)$ Å <sup>3</sup>                                     |
| Z                                 | 2                                                                |
| Density (calculated)              | $2.672$ Mg/m <sup>3</sup>                                        |
| Absorption coefficient            | $0.808$ mm <sup>-1</sup>                                         |
| F(000)                            | 808                                                              |
| Crystal size                      | $0.18 \times 0.16 \times 0.14$ mm <sup>3</sup>                   |
| Theta range for data collection   | $2.988$ to $27.505^\circ$ .                                      |
| Index ranges                      | $-6 \leq h \leq 7$ , $-16 \leq k \leq 14$ , $-13 \leq l \leq 13$ |
| Reflections collected             | 4692                                                             |
| Independent reflections           | 1732 [R(int) = 0.0588]                                           |
| Completeness to theta             | 99.9 %                                                           |
| Refinement method                 | Full-matrix least-squares on F <sup>2</sup>                      |
| Goodness-of-fit on F <sup>2</sup> | 1.067                                                            |
| Final R indices [I > 2σ(I)]       | R1 = 0.0500, wR2 = 0.0972                                        |
| R indices (all data)              | R1 = 0.0773, wR2 = 0.1072                                        |
| Largest diff. peak and hole       | 0.447 and -0.478 e.Å <sup>-3</sup>                               |

Table S2. Atoms coordinates and equivalent isotropic displacement parameters for LNBPO

| Atoms  | x         | y        | z        | U(eq) | BVS  |
|--------|-----------|----------|----------|-------|------|
| P(1)   | 2690(4)   | 7494(2)  | 5600(3)  | 14(1) | 5.13 |
| Na(1)  | 8404(15)  | 7508(7)  | 6694(9)  | 30(3) | 1.11 |
| Li(2)  | 2270(30)  | 8790(11) | 8010(20) | 18(4) | 0.94 |
| P(2)   | 7599(4)   | 6021(2)  | 3349(3)  | 16(1) | 5.07 |
| P(3)   | 7638(4)   | 9189(2)  | 3213(3)  | 15(1) | 5.03 |
| Na(2)  | 2281(7)   | 6136(3)  | 8018(5)  | 25(1) | 1.05 |
| Na(3)  | 10395(6)  | 4944(3)  | 5731(5)  | 30(1) | 0.94 |
| Na(4)  | 10261(7)  | 10039(5) | 5633(6)  | 53(2) | 0.94 |
| O(1)   | 8300(11)  | 7663(5)  | 4840(7)  | 13(2) | 2.32 |
| O(2)   | 9587(9)   | 8522(5)  | 3155(8)  | 17(2) | 2.05 |
| O(3)   | 11855(10) | 7615(5)  | 4314(7)  | 14(2) | 2.14 |
| O(4)   | 9417(9)   | 6759(5)  | 3137(8)  | 15(2) | 2.06 |
| O(5)   | 4943(9)   | 7775(5)  | 5435(7)  | 19(2) | 2.11 |
| O(6)   | 7842(11)  | 9976(5)  | 4135(7)  | 20(2) | 1.96 |
| O(7)   | 5924(11)  | 8438(5)  | 3547(7)  | 19(2) | 2.21 |
| O(8)   | 8085(12)  | 5283(5)  | 4268(8)  | 23(2) | 2.04 |
| O(9)   | 5834(11)  | 6710(5)  | 3779(7)  | 21(2) | 2.12 |
| O(10)  | 7015(10)  | 5590(5)  | 2184(8)  | 23(2) | 1.95 |
| O(11)  | 1765(11)  | 8243(6)  | 6417(8)  | 35(2) | 1.98 |
| O(12)  | 2445(12)  | 6458(5)  | 5994(8)  | 39(2) | 1.89 |
| O(13)  | 7218(11)  | 9566(6)  | 2002(8)  | 28(2) | 2.11 |
| B(1)   | 6277(19)  | 7636(9)  | 4435(13) | 21(3) | 3.05 |
| B(2)   | 9720(20)  | 7638(10) | 3924(12) | 19(3) | 3.02 |
| Li(1A) | 8540(50)  | 7940(40) | 6630(20) | 30(3) | 0.59 |

Symmetry transformations used to generate equivalent atoms:

#1  $x-1,y,z$  #2  $x+1,y,z$  #3  $-x+3/2,y,z+1/2$  #4  $-x+1,-y+2,z+1/2$

#5  $-x+1/2,y,z+1/2$  #6  $-x+1,-y+1,z-1/2$  #7  $-x+1/2,y,z-1/2$

#8  $x-1/2,-y+1,z$  #9  $-x+3/2,y,z-1/2$  #10  $x-1/2,-y+2,z$

#11  $-x+2,-y+2,z-1/2$  #12  $-x+1,-y+1,z+1/2$  #13  $x+1/2,-y+1,z$

#14  $-x+2,-y+1,z+1/2$  #15  $-x+2,-y+2,z+1/2$  #16  $x+1/2,-y+2,z$

#17  $-x+1,-y+2,z-1/2$  #18  $-x+2,-y+1,z-1/2$

Table S3 Selected distances (Å) and angles (deg) for LNBPO

|                |           |                       |          |
|----------------|-----------|-----------------------|----------|
| P(1)-O(3)#1    | 1.567(9)  | O(5)-P(1)-O(3)#1      | 101.7(5) |
| P(1)-O(5)      | 1.560(7)  | O(11)-P(1)-O(3)#1     | 110.7(5) |
| P(1)-O(11)     | 1.510(9)  | O(11)-P(1)-O(5)       | 107.4(4) |
| P(1)-O(12)     | 1.490(8)  | O(12)-P(1)-O(3)#1     | 109.8(5) |
| Na(1)-O(1)     | 2.066(11) | O(12)-P(1)-O(5)       | 112.0(4) |
| Na(1)-O(1)     | 2.110(11) | O(12)-P(1)-O(11)      | 114.5(6) |
| Na(1)-O(2)#2   | 2.935(13) | O(1)-Na(1)-O(2)#2     | 119.4(5) |
| Na(1)-O(4)#2   | 2.691(13) | O(1)-Na(1)-O(4)#2     | 128.2(5) |
| Na(1)-O(5)     | 2.733(12) | O(1)-Na(1)-O(5)       | 56.0(4)  |
| Na(1)-O(7)#2   | 2.492(13) | O(1)-Na(1)-O(7)#2     | 142.4(5) |
| Na(1)-O(9)#2   | 2.649(13) | O(1)-Na(1)-O(9)#2     | 159.0(6) |
| Na(1)-O(10)#2  | 2.689(12) | O(1)-Na(1)-O(10)#2    | 107.4(5) |
| Na(1)-O(11)#3  | 2.472(13) | O(1)-Na(1)-O(11)#3    | 82.2(5)  |
| Li(2)-O(2)#2   | 2.129(19) | O(1)-Na(1)-O(13)#2    | 91.1(4)  |
| Li(2)-O(3)#2   | 2.26(2)   | O(4)#2-Na(1)-O(2)#2   | 50.4(3)  |
| Li(2)-O(6)#4   | 2.11(2)   | O(4)#2-Na(1)-O(5)     | 77.2(3)  |
| Li(2)-O(7)#5   | 2.27(2)   | O(4)#2-Na(1)-O(13)#2  | 101.4(4) |
| Li(2)-O(11)    | 1.98(2)   | O(5)-Na(1)-O(2)#2     | 70.1(3)  |
| Li(2)-O(13)#4  | 2.536(19) | O(5)-Na(1)-O(13)#2    | 79.1(3)  |
| P(2)-O(4)      | 1.593(7)  | O(7)#2-Na(1)-O(2)#2   | 53.7(3)  |
| P(2)-O(8)      | 1.483(8)  | O(7)#2-Na(1)-O(4)#2   | 78.9(4)  |
| P(2)-O(9)      | 1.582(8)  | O(7)#2-Na(1)-O(5)     | 121.5(5) |
| P(2)-O(10)     | 1.496(9)  | O(7)#2-Na(1)-O(9)#2   | 54.8(3)  |
| P(3)-O(2)      | 1.586(7)  | O(7)#2-Na(1)-O(10)#2  | 109.8(4) |
| P(3)-O(6)      | 1.503(8)  | O(7)#2-Na(1)-O(13)#2  | 54.8(3)  |
| P(3)-O(7)      | 1.579(8)  | O(9)#2-Na(1)-O(2)#2   | 79.7(4)  |
| P(3)-O(13)     | 1.491(9)  | O(9)#2-Na(1)-O(4)#2   | 55.7(3)  |
| Na(2)-O(3)#2   | 2.560(8)  | O(9)#2-Na(1)-O(5)     | 132.9(5) |
| Na(2)-O(4)#2   | 2.361(7)  | O(9)#2-Na(1)-O(10)#2  | 55.7(3)  |
| Na(2)-O(8)#13  | 2.410(9)  | O(9)#2-Na(1)-O(13)#2  | 108.8(4) |
| Na(2)-O(9)#5   | 2.378(8)  | O(10)#2-Na(1)-O(2)#2  | 105.8(4) |
| Na(2)-O(10)#13 | 2.579(8)  | O(10)#2-Na(1)-O(4)#2  | 55.5(3)  |
| Na(2)-O(12)    | 2.337(10) | O(10)#2-Na(1)-O(5)    | 98.6(4)  |
| Na(3)-O(8)#14  | 2.459(10) | O(10)#2-Na(1)-O(13)#2 | 156.2(5) |
| Na(3)-O(8)     | 2.307(9)  | O(11)#3-Na(1)-O(2)#2  | 119.6(4) |
| Na(3)-O(10)#15 | 2.492(9)  | O(11)#3-Na(1)-O(4)#2  | 149.6(5) |
| Na(3)-O(10)#2  | 2.460(9)  | O(11)#3-Na(1)-O(5)    | 130.0(5) |

---

|                |           |                         |           |
|----------------|-----------|-------------------------|-----------|
| Na(3)-O(12)#14 | 2.756(10) | O(11)#3-Na(1)-O(7)#2    | 74.8(4)   |
| Na(3)-O(12)#3  | 2.493(8)  | O(11)#3-Na(1)-O(9)#2    | 96.1(4)   |
| Na(4)-O(5)#17  | 2.996(10) | O(11)#3-Na(1)-O(10)#2   | 121.0(5)  |
| Na(4)-O(6)#17  | 2.415(10) | O(11)#3-Na(1)-O(13)#2   | 75.4(4)   |
| Na(4)-O(6)     | 2.341(10) | O(13)#2-Na(1)-O(2)#2    | 51.0(3)   |
| Na(4)-O(11)#3  | 2.790(11) | O(2)#2-Li(2)-O(3)#2     | 64.8(6)   |
| Na(4)-O(13)#2  | 2.354(10) | O(2)#2-Li(2)-O(7)#5     | 149.8(10) |
| Na(4)-O(13)#16 | 2.347(11) | O(2)#2-Li(2)-O(13)#4    | 93.2(7)   |
| O(1)-B(1)      | 1.423(14) | O(3)#2-Li(2)-O(7)#5     | 85.0(7)   |
| O(1)-B(2)      | 1.403(15) | O(3)#2-Li(2)-O(13)#4    | 152.5(9)  |
| O(1)-Li(1A)    | 2.07(3)   | O(6)#4-Li(2)-O(2)#2     | 97.1(8)   |
| O(2)-Na(1)#6   | 2.935(13) | O(6)#4-Li(2)-O(3)#2     | 100.2(10) |
| O(2)-Li(2)#6   | 2.129(19) | O(6)#4-Li(2)-O(7)#5     | 88.3(8)   |
| O(2)-B(2)      | 1.490(15) | O(6)#4-Li(2)-O(13)#4    | 64.7(5)   |
| O(3)-P(1)#3    | 1.567(9)  | O(7)#5-Li(2)-O(13)#4    | 115.7(7)  |
| O(3)-Li(2)#6   | 2.26(2)   | O(11)-Li(2)-O(2)#2      | 100.1(10) |
| O(3)-Na(2)#6   | 2.560(8)  | O(11)-Li(2)-O(3)#2      | 112.0(8)  |
| O(3)-B(2)      | 1.491(15) | O(11)-Li(2)-O(6)#4      | 147.6(10) |
| O(4)-Na(1)#6   | 2.691(13) | O(11)-Li(2)-O(7)#5      | 90.3(8)   |
| O(4)-Na(2)#6   | 2.361(7)  | O(11)-Li(2)-O(13)#4     | 87.0(9)   |
| O(4)-B(2)      | 1.505(15) | O(8)-P(2)-O(4)          | 111.6(5)  |
| O(5)-Na(4)#11  | 2.996(10) | O(8)-P(2)-O(9)          | 110.4(5)  |
| O(5)-B(1)      | 1.452(16) | O(8)-P(2)-O(10)         | 114.2(4)  |
| O(6)-Li(2)#10  | 2.11(2)   | O(9)-P(2)-O(4)          | 103.6(3)  |
| O(6)-Na(4)#11  | 2.415(10) | O(10)-P(2)-O(4)         | 108.3(5)  |
| O(7)-Na(1)#6   | 2.492(13) | O(10)-P(2)-O(9)         | 108.2(5)  |
| O(7)-Li(2)#8   | 2.27(2)   | O(6)-P(3)-O(2)          | 111.4(5)  |
| O(7)-B(1)      | 1.504(16) | O(6)-P(3)-O(7)          | 111.3(5)  |
| O(7)-Li(1A)#6  | 2.30(3)   | O(7)-P(3)-O(2)          | 103.3(4)  |
| O(8)-Na(2)#7   | 2.410(9)  | O(13)-P(3)-O(2)         | 108.2(5)  |
| O(8)-Na(3)#9   | 2.459(10) | O(13)-P(3)-O(6)         | 114.1(5)  |
| O(9)-Na(1)#6   | 2.649(13) | O(13)-P(3)-O(7)         | 108.0(5)  |
| O(9)-Na(2)#8   | 2.378(8)  | O(10)#2-Na(3)-O(10)#15  | 96.6(4)   |
| O(9)-B(1)      | 1.494(14) | O(10)#2-Na(3)-O(12)#3   | 88.9(3)   |
| O(10)-Na(1)#6  | 2.689(12) | O(10)#15-Na(3)-O(12)#14 | 102.7(3)  |
| O(10)-Na(2)#7  | 2.579(8)  | O(10)#15-Na(3)-O(12)#3  | 77.5(3)   |
| O(10)-Na(3)#18 | 2.492(9)  | O(10)#2-Na(3)-O(12)#14  | 73.3(3)   |
| O(10)-Na(3)#6  | 2.460(9)  | O(6)#17-Na(4)-O(5)#17   | 90.4(3)   |

---

|                        |           |                        |           |
|------------------------|-----------|------------------------|-----------|
| O(11)-Na(1)#1          | 2.472(13) | O(6)-Na(4)-O(5)#17     | 86.2(3)   |
| O(11)-Na(4)#1          | 2.790(11) | O(6)-Na(4)-O(6)#17     | 88.8(4)   |
| O(11)-Li(1A)#1         | 2.20(4)   | O(6)-Na(4)-O(11)#3     | 116.5(3)  |
| O(12)-Na(3)#9          | 2.756(10) | O(6)#17-Na(4)-O(11)#3  | 87.8(3)   |
| O(12)-Na(3)#1          | 2.493(8)  | O(6)-Na(4)-O(13)#16    | 168.2(4)  |
| O(13)-Na(1)#6          | 2.858(13) | O(6)-Na(4)-O(13)#2     | 89.1(3)   |
| O(13)-Li(2)#10         | 2.536(19) | O(11)#3-Na(4)-O(5)#17  | 157.2(3)  |
| O(13)-Na(4)#6          | 2.354(10) | O(13)#2-Na(4)-O(5)#17  | 105.8(3)  |
| O(13)-Na(4)#12         | 2.347(11) | O(13)#16-Na(4)-O(5)#17 | 82.6(3)   |
| O(13)-Li(1A)#6         | 2.31(5)   | O(13)#16-Na(4)-O(6)#17 | 87.6(3)   |
| O(3)#2-Na(2)-O(10)#13  | 152.7(3)  | O(13)#2-Na(4)-O(6)#17  | 163.6(4)  |
| O(4)#2-Na(2)-O(3)#2    | 58.3(3)   | O(13)#16-Na(4)-O(11)#3 | 74.6(3)   |
| O(4)#2-Na(2)-O(8)#13   | 110.5(3)  | O(13)#2-Na(4)-O(11)#3  | 78.6(3)   |
| O(4)#2-Na(2)-O(9)#5    | 132.3(3)  | O(13)#16-Na(4)-O(13)#2 | 97.4(4)   |
| O(4)#2-Na(2)-O(10)#13  | 100.4(3)  | O(1)-B(1)-O(5)         | 108.9(10) |
| O(8)#13-Na(2)-O(3)#2   | 108.6(3)  | O(1)-B(1)-O(7)         | 110.2(9)  |
| O(8)#13-Na(2)-O(10)#13 | 60.1(3)   | O(1)-B(1)-O(9)         | 111.7(9)  |
| O(9)#5-Na(2)-O(3)#2    | 74.3(3)   | O(5)-B(1)-O(7)         | 109.3(9)  |
| O(9)#5-Na(2)-O(8)#13   | 87.9(3)   | O(5)-B(1)-O(9)         | 112.2(9)  |
| O(9)#5-Na(2)-O(10)#13  | 126.3(3)  | O(9)-B(1)-O(7)         | 104.5(10) |
| O(12)-Na(2)-O(3)#2     | 113.8(3)  | O(1)-B(2)-O(2)         | 111.9(10) |
| O(12)-Na(2)-O(4)#2     | 86.8(3)   | O(1)-B(2)-O(3)         | 115.0(10) |
| O(12)-Na(2)-O(8)#13    | 137.0(3)  | O(1)-B(2)-O(4)         | 111.6(9)  |
| O(12)-Na(2)-O(9)#5     | 109.5(3)  | O(2)-B(2)-O(3)         | 104.2(9)  |
| O(12)-Na(2)-O(10)#13   | 78.7(3)   | O(2)-B(2)-O(4)         | 106.9(9)  |
| O(8)-Na(3)-O(8)#14     | 91.5(4)   | O(3)-B(2)-O(4)         | 106.6(9)  |
| O(8)-Na(3)-O(10)#2     | 88.5(3)   | O(1)-Li(1A)-O(7)#2     | 172(2)    |
| O(8)#14-Na(3)-O(10)#15 | 84.5(3)   | O(1)-Li(1A)-O(11)#3    | 90.0(14)  |
| O(8)#14-Na(3)-O(10)#2  | 166.0(3)  | O(1)-Li(1A)-O(13)#2    | 109.7(18) |
| O(8)-Na(3)-O(10)#15    | 173.6(4)  | O(7)#2-Li(1A)-O(13)#2  | 65.3(10)  |
| O(8)-Na(3)-O(12)#3     | 106.5(3)  | O(11)#3-Li(1A)-O(7)#2  | 84.2(8)   |
| O(8)-Na(3)-O(12)#14    | 75.0(3)   | O(11)#3-Li(1A)-O(13)#2 | 93.1(16)  |
| O(8)#14-Na(3)-O(12)#3  | 77.6(3)   |                        |           |

Symmetry transformations used to generate equivalent atoms:

#1  $x-1,y,z$  #2  $x+1,y,z$  #3  $-x+3/2,y,z+1/2$  #4  $-x+1,-y+2,z+1/2$

#5  $-x+1/2,y,z+1/2$  #6  $-x+1,-y+1,z-1/2$  #7  $-x+1/2,y,z-1/2$

#8  $x-1/2,-y+1,z$  #9  $-x+3/2,y,z-1/2$  #10  $x-1/2,-y+2,z$

#11  $-x+2,-y+2,z-1/2$  #12  $-x+1,-y+1,z+1/2$  #13  $x+1/2,-y+1,z$



#14  $-x+2,-y+1,z+1/2$     #15  $-x+2,-y+2,z+1/2$     #16  $x+1/2,-y+2,z$   
#17  $-x+1,-y+2,z-1/2$     #18  $-x+2,-y+1,z-1/2$
